# Supplementary material for: Organic photodetectors based on pentacene single crystals with fast response and flexibility
Source: Royal Society of Chemistry journal article supplement (doi:10.1039/d2tc05432a), 2023-01-01
Supplement: d2tc05432a1.pdf [file d2tc05432a1.pdf]

## **Organic photodetectors based on pentacene single crystals with fast response and flexibility**

Qianqian Du,<sup>a#</sup> Zhifeng Wang,<sup>a#</sup> Mengru Li,<sup>a#</sup> Yuquan Gan,<sup>a</sup> Shuhong Li,<sup>a</sup> Yunlong  
Liu,<sup>a</sup> Wenjun Wang,<sup>\*a</sup> Fengqiu Wang,<sup>b</sup> and Shuchao Qin,<sup>\*a</sup>

<sup>a</sup>Key Laboratory of Optical Communication Science and Technology of Shandong  
Province, School of Physical Science and Information Engineering, Liaocheng  
University, Liaocheng 252059, China

<sup>b</sup>School of Electronic Science and Engineering and Key Laboratory of Intelligent  
Optical Sensing and Manipulation, Ministry of Education, Nanjing University,  
Nanjing 210093, China

Corresponding Authors:

\*E-mail: Shuchao Qin (lcqinshuchao@126.com); Wenjun Wang (phywwang@163.com)

#These authors contributed equally to this work.

## S1. AFM image of pentacene single crystal

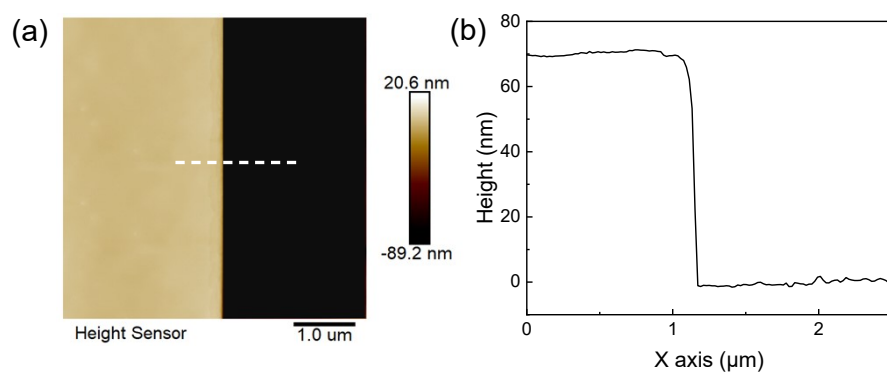

**Fig. S1** (a) AFM image of pentacene single crystal grown directly on the  $\text{SiO}_2/\text{Si}$  substrate. (b) Height of sample, along the white dash lines in panel **a**.

## S2. The thickness of PMMA

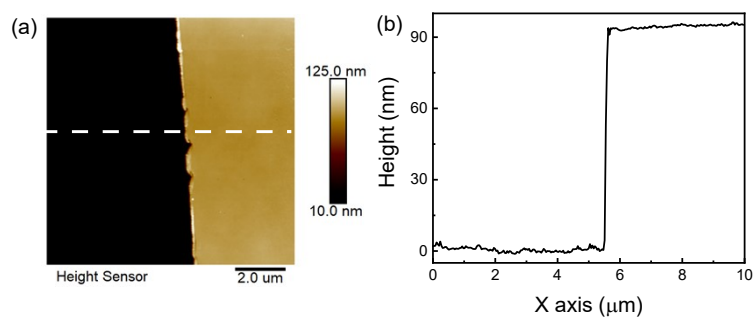

**Fig. S2** (a) AFM image of PMMA on SiO<sub>2</sub>/Si substrate. (b) Height of PMMA, along the white dash lines in panel a.

## S3. Height of pentacene single crystal

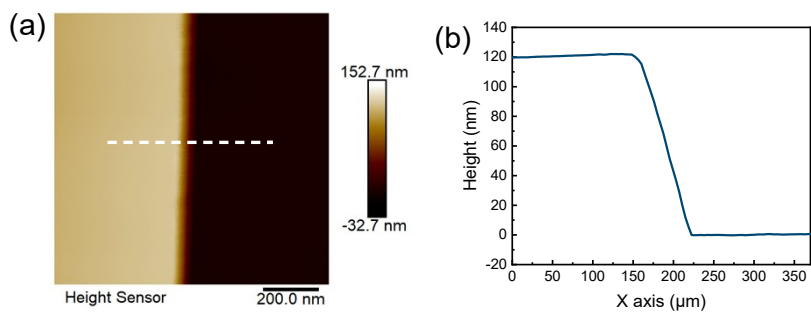

**Fig. S3** (a) AFM image of the sample. (b) The height, along the white dash lines in panel a.

#### S4. The unit capacitance of PMMA

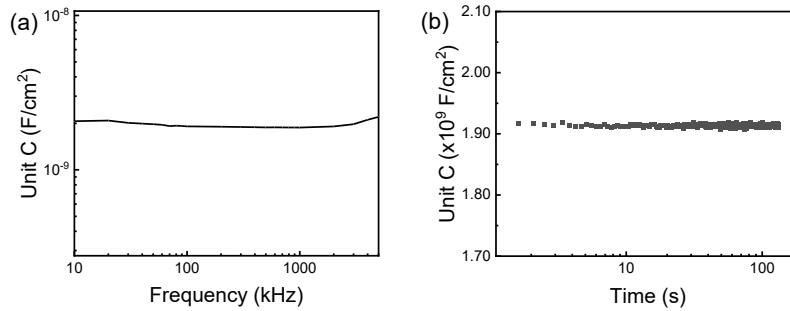

**Fig. S4** (a) The frequency-capacitance of PMMA using the parallel-plate mode. (b) The unit capacitance of PMMA under 100 kHz.

#### S5. The responsivity of device on SiO<sub>2</sub> substrate

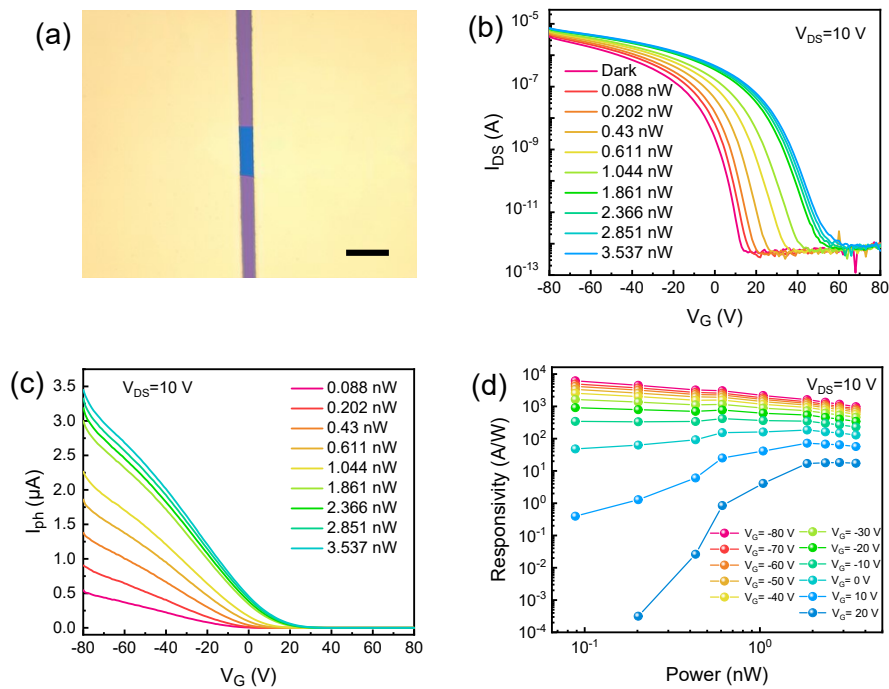

**Fig. S5** (a) Optical microscopy image of the device. (b) Transfer curves of the device in dark and light conditions (658 nm laser), at  $V_{DS}=10$  V. (c) Photocurrent as a function of the light powers. (d) Dependence of the responsivity on the illumination power at different gate bias.

**S6: Noise spectral density under different source-drain bias.**

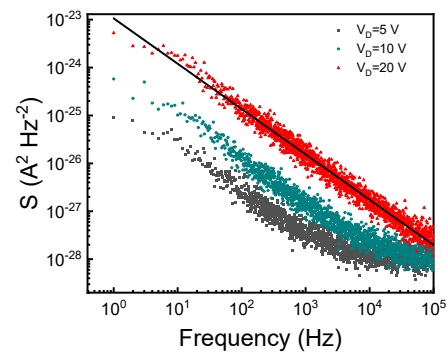

**Fig. S6** Noise spectral density of the device on PET substrate under different bias voltage.
